# Supplementary material for: Use of symptom-relieving drugs before and after surgery for urinary incontinence in women: a cohort study
Source: HighWire-hosted journal article supplement (doi:10.1136/bmjopen-2013-003297), 2013-11-01
Supplement: bmjopen-2013-003297supp_appendix.pdf [file bmjopen-2013-003297supp_appendix.pdf]

## **Appendix 1** Surgical procedures according to the Danish Nordic Medico-Statistical Committee

- KDG00 = Retropubic suspension of urethra
- KDG01 = Percutaneous endoscopic retropubic suspension of urethra
- KDG10 = Abdominovaginal suspension of bladder neck
- KDG30 = Suprapubic sling urethrocytopexy
- KDG31 = Percutaneous endoscopic suprapubic sling
- KDG40 = Suprapubic urethrocytopexy
- KDG50 = Transabdominal plastic repair of pelvic floor for urinary incontinence
- KDG96 = Other operation on urethra or bladder neck for incontinence
- KDG97 = Other percutaneous endoscopic operation on urethra or bladder neck for incontinence
- KDV20 = Submucous urethral injection
- KDV22 = Transluminal endoscopic submucous urethral injection
- LEG00 = Vaginal urethrocytopexy
- LEG10 = Vaginal urethrocytopexy with use of sling
- LEG10A = Vaginal urethrocytopexy with use of sling through foramen obturatum
- LEG20 = Plastic repair of female pelvic floor with levator division
- LEG96 = Other vaginal operation for incontinence
